# Supplementary material for: Electrodeposited Cu–Pd bimetallic catalysts for the selective electroreduction of CO2 to ethylene
Source: Royal Society of Chemistry journal article supplement (doi:10.1039/d0gc03051a), 2020-01-01
Supplement: d0gc03051a1.pdf [file d0gc03051a1.pdf]

## Supporting Information

### Electrodeposited Cu-Pd Bimetallic Catalysts for the Selective Electroreduction of CO<sub>2</sub> to Ethylene

Ruting Feng,<sup>a</sup> Qinggong Zhu,<sup>b</sup> Menggen Chu,<sup>a</sup> Shuaiqiang Jia,<sup>a</sup> Jianxin Zhai,<sup>a</sup> Haihong Wu,<sup>\*a</sup> Peng Wu,<sup>\*a</sup> Buxing Han,<sup>\*a,b</sup>

*[a] Shanghai Key Laboratory of Green Chemistry and Chemical Processes, School of Chemistry and Molecular Engineering, East China Normal University, Shanghai 200062, P. R. China*

*[b] Beijing National Laboratory for Molecular Sciences, CAS Key Laboratory of Colloid and Interface and Thermodynamics, CAS Research/Education Center for Excellence in Molecular Sciences, Institute of Chemistry, Chinese Academy of Sciences, Zhongguancun North First Street 2, Beijing, 100190, P. R. China*

*E-mail: hhwu@chem.ecnu.edu.cn; pwu@chem.ecnu.edu.cn; hanbx@iccas.ac.cn*

## Contents

|                            |    |
|----------------------------|----|
| Experimental Section-----  | 3  |
| Supplementary Figures----- | 6  |
| Supplementary Tables-----  | 12 |
| References -----           | 15 |

## Experimental Section

### Materials

Palladium (II) sulfate ( $\text{PdSO}_4$ ), Copper (II) sulfate ( $\text{CuSO}_4 \cdot 5\text{H}_2\text{O}$ ), sulfuric acid ( $\text{H}_2\text{SO}_4$ ), Toray Carbon Paper (CP, TGP-H-60, 19 cm  $\times$  19 cm), and Nafion N-117 membrane (0.180 mm thick,  $\geq 0.90$  meg/g exchange capacity) were purchased from Alfa Aesar China Co., Ltd. Both  $\text{CO}_2$  and  $\text{N}_2$  had a purity of 99.999%, and were provided by Shanghai Chemistry Industrial Zone Pujiang Special Type Gas Co., Ltd.

### Preparation of Cu-Pd bimetallic catalysts

Electrochemical deposition was carried out using a solution of 0.1 M  $\text{CuSO}_4$ , 1 mM  $\text{PdSO}_4$ , and 0.1 M  $\text{H}_2\text{SO}_4$  in a 50 mL electrolytic tank. Carbon paper and Pt gauze with 1 cm<sup>2</sup> area each acted as cathode and anode. The electrodeposition was conducted by high resolution DC power supply (HY3005B, Hangzhou Huayi Electronics Industry Co., Ltd.) which outputted a steady current for desired time.

Other electrocatalysts (Cu-Pd/CP-CV, Cu-Pd/CP-IT) were synthesized by electrochemical workstation (Voltammetry and Amperometric-i-t) in three electrode system for comparison. The number of electrons was controlled to 12 coulombs, cyclic voltammetry and Amperometry were performed at -0.2 V with scan rate 50 mv s<sup>-1</sup>, respectively.

### Characterization

The morphology of the electrodes was characterized by Hitachi S4800 scanning electron microscope (SEM) at 3 kV and transmission electron microscopy (TEM, JEOL JEM-2100F) equipped with EDS. X-ray diffraction (XRD) analysis of the samples were performed on Rigaku and model with  $\text{CuK}\alpha$  radiation (1.5418 Å). X-ray photoelectron spectroscopy (XPS) study was carried out on the AXIS Supra surface analysis instrument with an X-ray monochromatic source (combined Al/Ag anode, energy 1486.6/2984.2eV) and studies were performed in 10<sup>-9</sup> mbar vacuum.

### Electrochemical study

All the electrochemical experiments were conducted on the electrochemical workstation (CHI 660E, Shanghai CH Instruments Co., China). Linear sweep voltammetry (LSV) measurement was carried out in a two-compartment H-cell separated by an ion exchange membrane (Nafion 117) with three electrodes on an electrochemical workstation (CHI 660E, Shanghai CH Instruments Co., China), which were a working electrode (Cu-Pd), a platinum gauze auxiliary electrode, and an Ag/AgCl (3M KCl). 0.1 M KCl solution and 0.1 M  $\text{KHCO}_3$  solution were utilized as the cathode and anodic electrolytes, respectively.<sup>[1]</sup> In all measurements, we used Ag/AgCl as the reference electrode, and the potential (vs. Ag/AgCl) was converted to RHE using the following equation<sup>[2]</sup>:

$$E(\text{RHE}) = E(\text{Ag}/\text{AgCl}) + 0.197 + 0.059 \times \text{pH}$$

The electrolytes were bubbled with CO<sub>2</sub> or N<sub>2</sub> at least 30 min to ensure formation of N<sub>2</sub>-saturated or CO<sub>2</sub>-saturated solution before experiments. LSV measurements in gas-saturated electrolytes were carried out in the potential range of 0 V to -1.4 V versus RHE at a sweep rate of 50 mV s<sup>-1</sup>. Slight magnetic stirring was employed to acquire uniform electrolytes.

### **Electrochemical impedance spectroscopy (EIS) measurements**

The experimental apparatus was the same as that used for the LSV measures. Measurements were carried out in CO<sub>2</sub>-saturated 0.1 M KCl solution at an open circuit potential (OCP) with a frequency range from 10<sup>-2</sup> Hz to 10<sup>5</sup> Hz and the amplitude was 5 mV. The data were fitted by View<sup>®</sup> software (Version 2.9c, Scribner Associates, USA).

### **CO<sub>2</sub> reduction electrolysis**

The electroreduction of CO<sub>2</sub> was performed at room temperature in a gas-tight H-type electrolysis cell separated by an ion exchange membrane (Nafion 117), which is equipped with a three-electrode system including a working electrode (Cu-Pd), a platinum gauze auxiliary electrode, and an Ag/AgCl (3 M KCl) reference electrode. In the experiments, 0.1 M KCl (30 mL) solution and 0.1 M KHCO<sub>3</sub> (30 mL) solution were utilized as catholyte and anolyte, respectively. Before the electrolysis, CO<sub>2</sub> was bubbled through the cathodic electrolyte for 30 min to remove the air and form a CO<sub>2</sub>-saturated solution. The reaction was performed with a steady flow of CO<sub>2</sub> (10 sccm) at a constant potential. Before electrolysis, the cathode was electrochemically reduced using cyclic voltammetry (CV), which ranged from 0 to -1.4V (vs. RHE) at a scan rate of 100 mV s<sup>-1</sup> for 5 cycles to remove the possible oxidized species.

### **Product analysis**

After the electrolysis reaction, the gas-phase products were analyzed by a gas chromatograph (GC; Agilent-8890A), which was equipped with TCD detector. The liquid product was quantified using a nuclear magnetic resonance (NMR) spectrometry (Bruker, Ascend 400-400 MHz) in [D<sub>6</sub>] DMSO with phenol as the internal standard. The Faradaic efficiency (FE) of the products was calculated using  $FE = \alpha n F / Q$ , where  $\alpha$  is the number of electrons transferred in the electrochemical reaction,  $n$  is the number of moles for a given products,  $F$  is Faraday's constant (96485 C mol<sup>-1</sup>), and  $Q$  represents all the charge passed throughout the electrolysis process.

### **Double-layer capacitance (C<sub>dl</sub>) measurements.**

The electrochemical active surface area is proportional to C<sub>dl</sub> value. C<sub>dl</sub> was determined in H-type electrolysis cell by measuring the capacitive current associated

with double-layer charging from the scan-rate dependence of cyclic voltammogram (CV). The CV ranged from -1.35 V -1.45 V vs. Ag/AgCl. The  $C_{dl}$  was estimated by plotting the  $\Delta j$  ( $j_a - j_c$ ) at -1.35 V vs Ag/AgCl against the scan rates, in which the  $j_a$  and  $j_c$  were the anodic and cathodic current density, respectively.

## Supplementary Figures

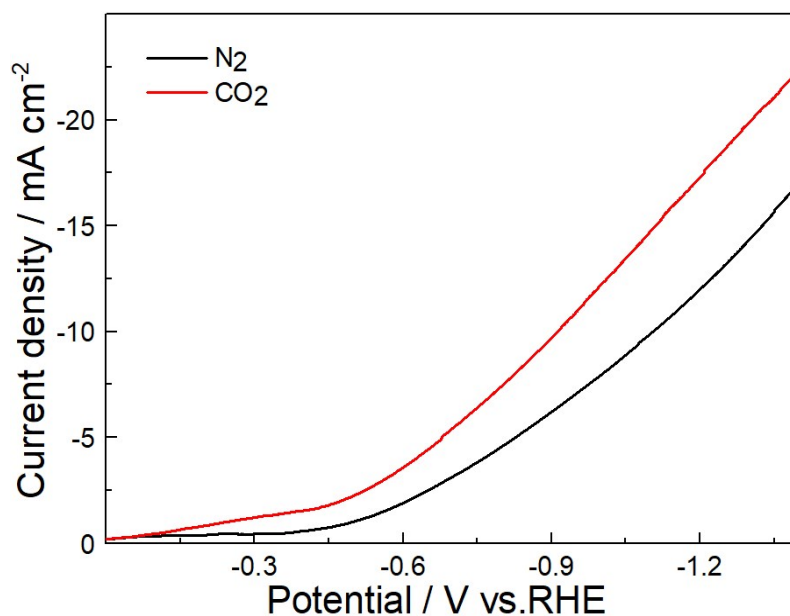

**Figure S1.** LSV of Cu-Pd/CP in N<sub>2</sub>- and CO<sub>2</sub>-saturated 0.1 M KCl.

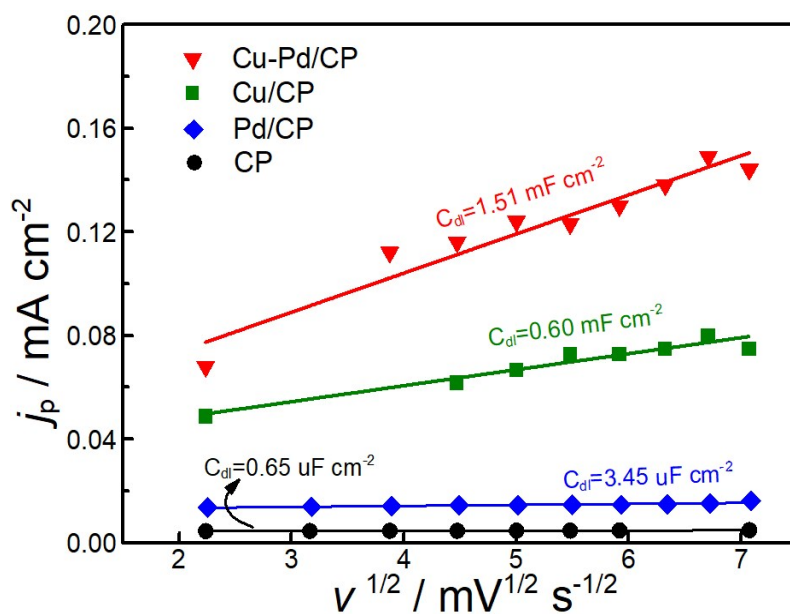

**Figure S2.** Charging current density against scan rates over different electrodes in CO<sub>2</sub> saturated 0.1 M KCl electrolyte.

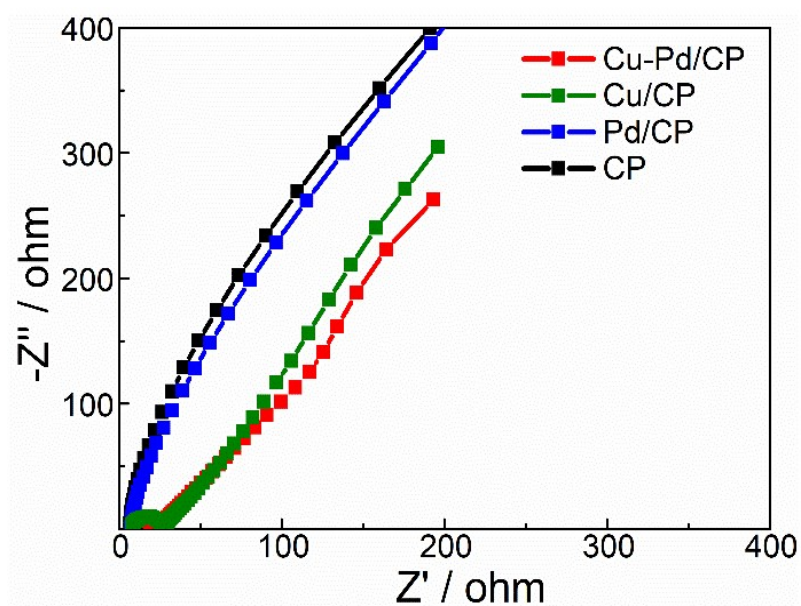

**Figure S3.** Nyquist plots over the four electrodes (CP, Cu/CP, Pd/CP and Cu-Pd/CP).

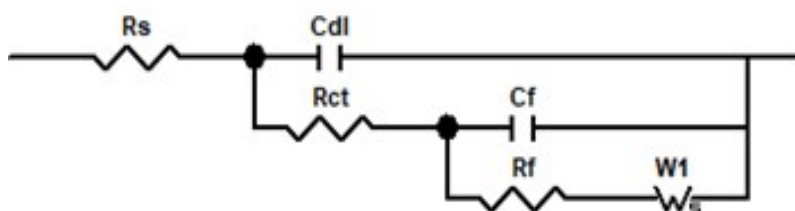

**Figure S4.** Equivalent circuit used for fitting the data of Nyquist plots. The components contain solution resistance ( $R_s$ ), double layer capacitance ( $CPE_{dl}$ ), electron transfer resistance ( $R_{ct}$ ), film capacitance ( $C_f$ ), film resistance ( $R_f$ ) and Warburg-type impedance ( $Z_w$ ).

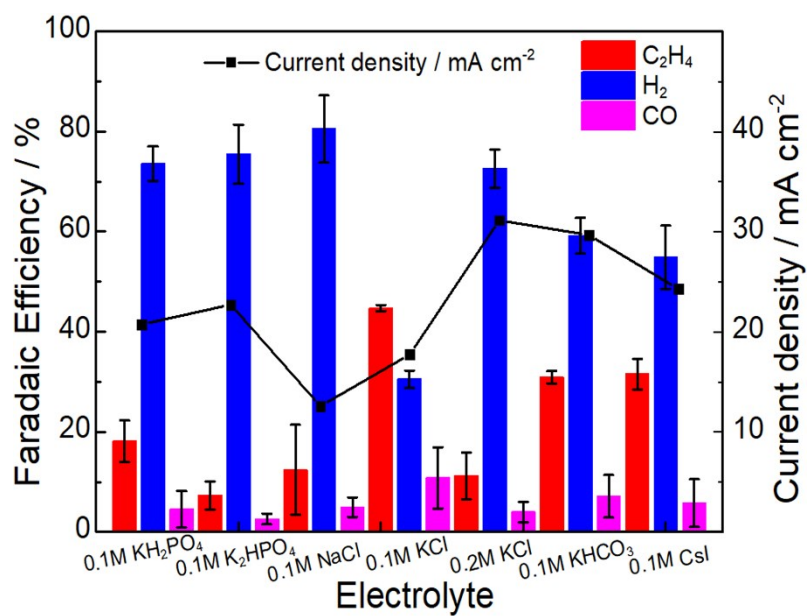

**Figure S5.** The FE of C<sub>2</sub>H<sub>4</sub> over Cu-Pd/CP catalyst in various electrolytes at -1.2 V vs. RHE.

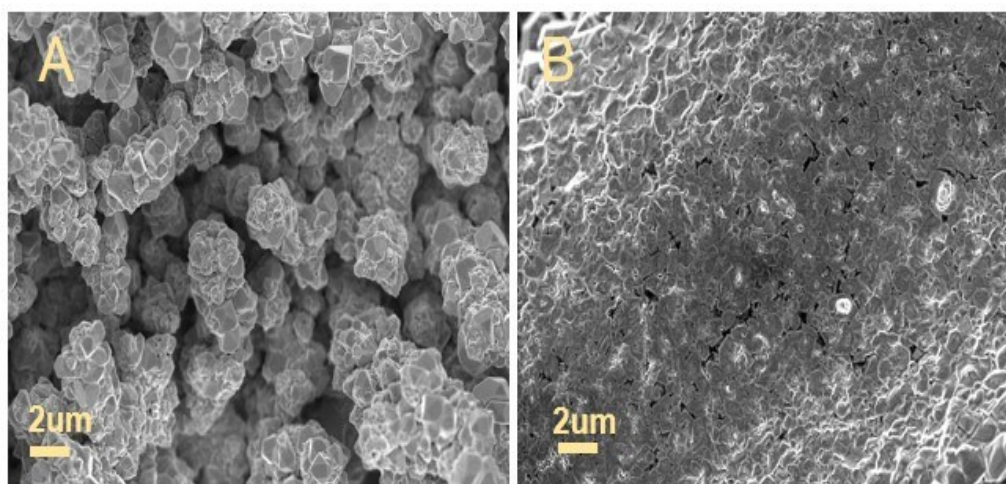

**Figure S6.** SEM images: A) Cu-Pd/CP-CV catalyst; B) Cu-Pd/CP-IT catalyst.



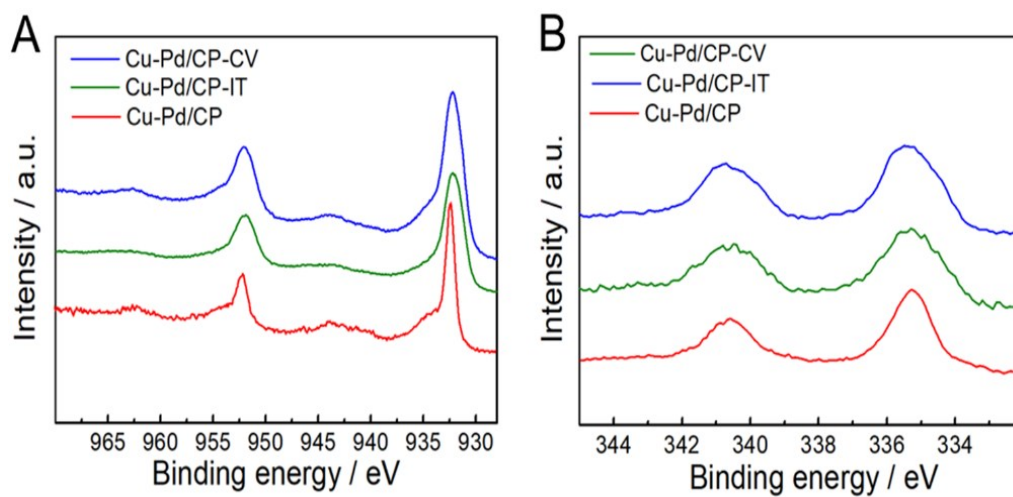

**Figure S7.** XPS spectra of: A) Cu 2p, B) Pd 3d XPS spectra of Cu-Pd/CP, Cu-Pd/CP-CV and Cu-Pd/CP-IT.

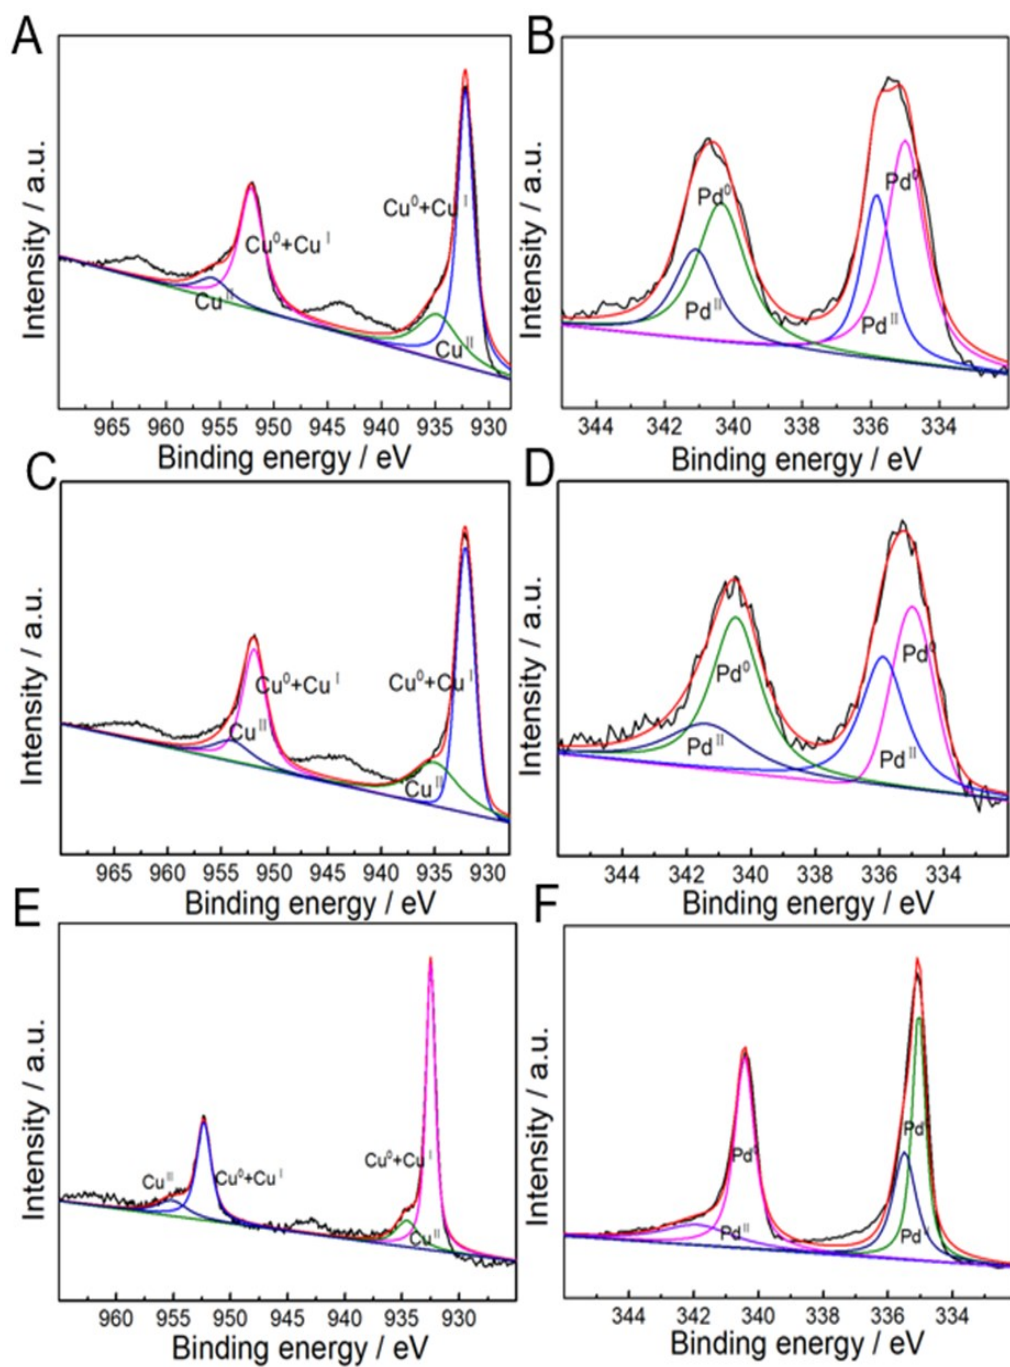

**Figure S8.** XPS spectra of Cu 2p of A) Cu-Pd/CP-CV and C) Cu-Pd/CP-IT catalysts, Pd3p of B) Cu-Pd/CP-CV and D) Cu-Pd/CP-IT. E) Cu/CP and F) Pd/CP.

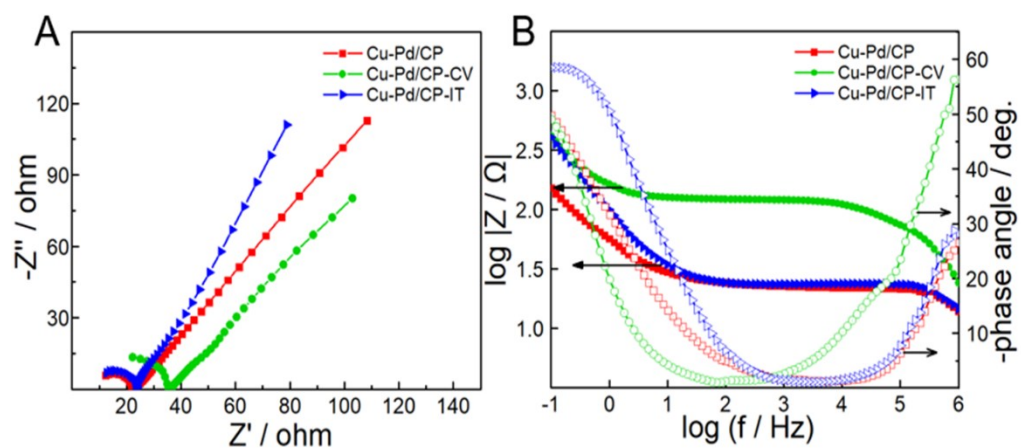

**Figure S9.** A) Nyquist plots B) and C) Bode plots obtained for three electrodes (Cu-Pd/CP, Cu-Pd/CP-CV, Cu-Pd/CP-IT) in  $\text{CO}_2$ -saturated 0.1 M KCl solution.

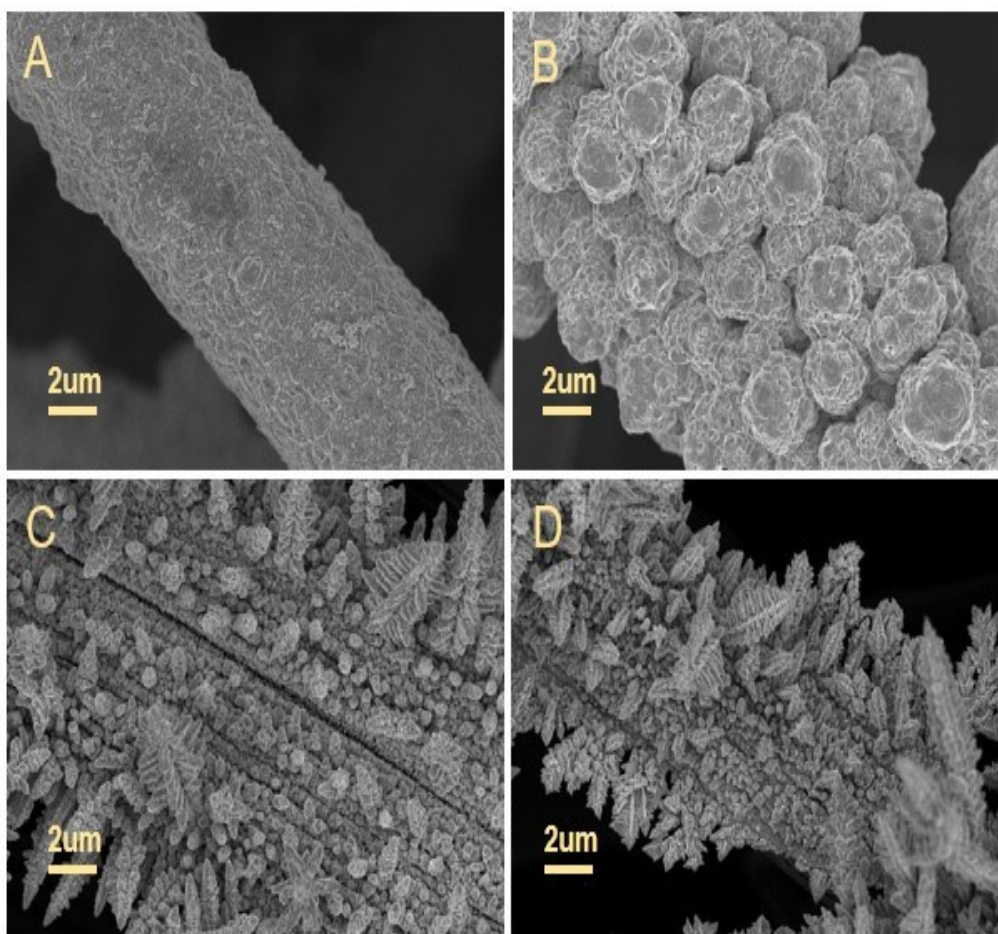

**Figure S10.** SEM images of Cu-Pd/CP catalysts under the deposition current of A) 8.7 mA (-0.1 V), B) 25.4 mA (-0.4 V), C) 26 mA (-0.6 V), D) 32.5 mA (-0.8 V) vs. Ag/AgCl.

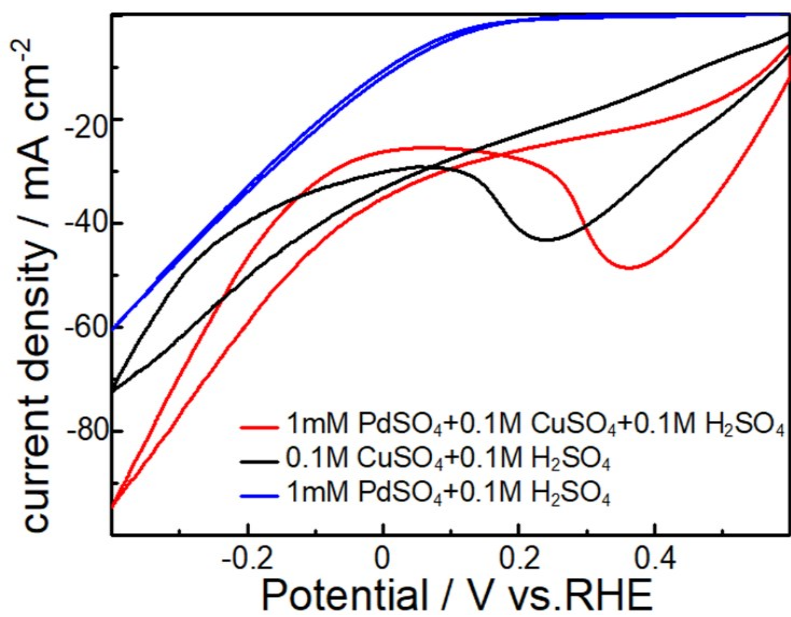

**Figure S11.** Cyclic voltammetry curves of bulk carbon paper in three electroplating baths.

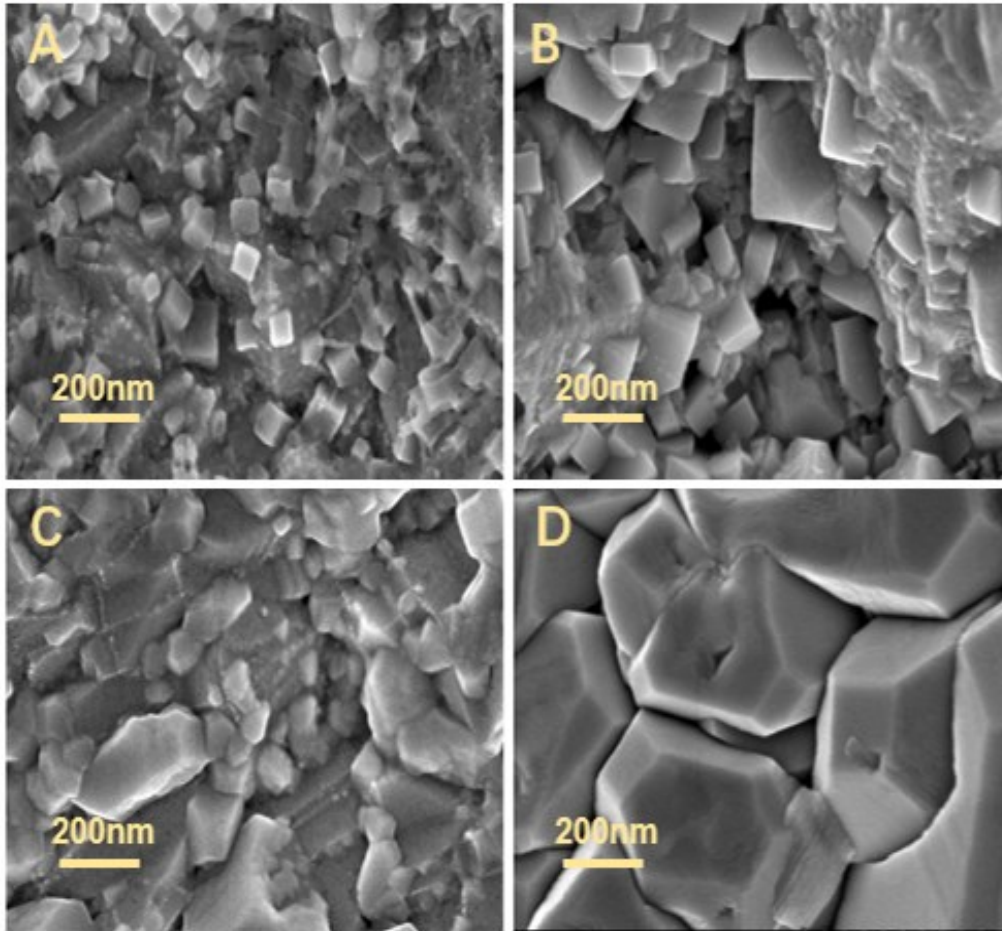

**Figure S12.** SEM images of A) 5 min, B) 10 min, C) 15 min, D) 20 min deposition time at 20 mA cm<sup>-2</sup>.

## Supplementary Tables

**Table S1.** Comparison of the results of CO<sub>2</sub> electroreduction to ethylene over various Cu-based composite electrocatalysts.

| Electrocatalyst                           | Potential / V      | Electrolyte                           | FE/% | Current density / mA cm <sup>-2</sup> | Ref.      |
|-------------------------------------------|--------------------|---------------------------------------|------|---------------------------------------|-----------|
| <b>H-type cell</b>                        |                    |                                       |      |                                       |           |
| Bimetallic Cu-Pd catalysts                | -1.2 V vs. RHE     | 0.1 M KCl                             | 45.2 | 17.4                                  | This work |
| Cu <sub>10</sub> -Sb <sub>1</sub>         | -1.19 V vs. RHE    | 0.1 M KCl                             | 49.5 | 28.5                                  | [2]       |
| Ag/Cu nanocrystals                        | -1.1 V vs. RHE     | 0.1 M KHCO <sub>3</sub>               | 40   | 1.0                                   | [3]       |
| Carbon-supported Cu catalyst              | -2.2 V vs. Ag/AgCl | 0.1 M KHCO <sub>3</sub>               | 45   | 22.5                                  | [4]       |
| Ag-Cu arrays                              | -1.2 V vs. RHE     | 0.5 M KHCO <sub>3</sub>               | 41.3 | 8.45                                  | [5]       |
| Cu <sub>2</sub> O/rGO                     | -1.4 V vs. RHE     | 0.1 M KHCO <sub>3</sub>               | 19.7 | 12                                    | [6]       |
| Cu-C <sub>3</sub> N <sub>4</sub>          | 1.6 V vs Ag/AgCl   | 0.1 M KHCO <sub>3</sub>               | 10   | ~7.5                                  | [7]       |
| Cu-Zn bimetallic catalyst                 | -1.1 V vs. RHE     | 0.1 M KHCO <sub>3</sub>               | 33.3 | 6.1                                   | [8]       |
| Cu/ICTF <sub>50</sub>                     | -1.3 V vs. RHE     | 0.1 M KCl+<br>0.1 M KHCO <sub>3</sub> | 34   | 11.8                                  | [9]       |
| 4H Au@Cu nanoribbon                       | -1.11 V vs RHE     | 0.1 M KHCO <sub>3</sub>               | 44.9 | 30.2                                  | [10]      |
| GMC-[Cu <sub>2</sub> (NTB) <sub>2</sub> ] | -1.27 V vs RHE     | 0.1 M KCl                             | 40   | 13                                    | [11]      |
| <b>Flow cell</b>                          |                    |                                       |      |                                       |           |
| Cu/N-CNF                                  | -0.57 V vs. RHE    | 5 M KOH                               | 62   | 600                                   | [12]      |
| Cu@Cu <sub>x</sub> O                      | -1.58 V vs. RHE    | 0.1 M KHCO <sub>3</sub>               | 45.8 | 150                                   | [13]      |
| Electrodeposited CuAg alloy               | -0.7 V vs. RHE     | 1M KOH                                | 60   | 300                                   | [14]      |

**Table S2.** Ratio of Cu/Pd,  $(\text{Cu}^0+\text{Cu}^{\text{I}})/\text{Cu}^{\text{II}}$  and  $\text{Pd}^{\text{II}}/\text{Pd}^0$  calculated from Cu2p and Pd3p signals of three electrodes.

| Electrodes  | Cu/Pd ratio (by XPS) | Atomic ratio of $(\text{Cu}^0+\text{Cu}^{\text{I}})/\text{Cu}^{\text{II}}$ | Atomic ratio of $\text{Pd}^0/\text{Pd}^{\text{II}}$ |
|-------------|----------------------|----------------------------------------------------------------------------|-----------------------------------------------------|
| Cu-Pd/CP    | 6.83                 | 2.48                                                                       | 0.405                                               |
| Cu-Pd/CP-CV | 32.20                | 3.20                                                                       | 0.625                                               |
| Cu-Pd/CP-IT | 61.20                | 3.00                                                                       | 0.617                                               |

**Table S3.** Parameter values of the equivalent circuit model.

| Electrodes  | $R_s$ ( $\Omega\text{cm}^{-2}$ ) | $R_{ct}$ ( $\Omega\text{ cm}^{-2}$ ) | $R_f$ ( $\Omega\text{ cm}^{-2}$ ) |
|-------------|----------------------------------|--------------------------------------|-----------------------------------|
| Cu-Pd/CP    | 8.756                            | 13.35                                | 2.50                              |
| Cu-Pd/CP-CV | 9.449                            | 15.42                                | 10.50                             |
| Cu-Pd/CP-IT | 10.540                           | 15.90                                | 2.51                              |



## References

- [1] X. Sun, Q. Zhu, X. Kang, H. Liu, Q. Qian, Z. Zhang, B. Han, *Angew. Chem. Int. Ed.* **2016**, *55*, 6771-6775.
- [2] S. Jia, Q. Zhu, H. Wu, M. e. Chu, S. Han, R. Feng, J. Tu, J. Zhai, B. Han, *Chinese. J. Catal.* **2020**, *41*, 1091-1098.
- [3] J. Huang, M. Mensi, E. Oveisi, V. Mantella, R. Buonsanti, *J. Am. Chem. Soc.* **2019**, *141*, 2490-2499.
- [4] O. A. Baturina, Q. Lu, M. A. Padilla, L. Xin, W. Li, A. Serov, K. Artyushkova, P. Atanassov, F. Xu, A. Epshteyn, T. Brintlinger, M. Schuette, G. E. Collins, *Acs. Catal.* **2014**, *4*, 3682-3695.
- [5] L. Hou, J. Han, C. Wang, Y. Zhang, Y. Wang, Z. Bai, Y. Gu, Y. Gao, X. Yan, *Inorganic Chemistry Frontiers* **2020**, *7*, 2097-2106.
- [6] H. Ning, Q. Mao, W. Wang, Z. Yang, X. Wang, Q. Zhao, Y. Song, M. Wu, *J. Alloys Compd.* **2019**, *785*, 7-12.
- [7] Y. Jiao, Y. Zheng, P. Chen, M. Jaroniec, S. Z. Qiao, *J. Am. Chem. Soc.* **2017**, *139*, 18093-18100.
- [8] Y. Feng, Z. Li, H. Liu, C. Dong, J. Wang, S. A. Kulinich, X. Du, *Langmuir* **2018**, *34*, 13544-13549.
- [9] M. J. Mao, M. D. Zhang, D. L. Meng, J. X. Chen, C. He, Y. B. Huang, R. Cao, *ChemCatChem* **2020**, *12*, 3530-3536.
- [10] Y. Chen, Z. Fan, J. Wang, C. Ling, W. Niu, Z. Huang, G. Liu, B. Chen, Z. Lai, X. Liu, B. Li, Y. Zong, L. Gu, J. Wang, X. Wang, H. Zhang, *J. Am. Chem. Soc.* **2020**.
- [11] M. Balamurugan, H. Y. Jeong, V. S. K. Choutipalli, J. S. Hong, H. Seo, N. Saravanan, J. H. Jang, K. G. Lee, Y. H. Lee, S. W. Im, V. Subramanian, S. H. Kim, K. T. Nam, *Small* **2020**, *16*, e2000955.
- [12] J.-C. Lee, J.-Y. Kim, W.-H. Joo, D. Hong, S.-H. Oh, B. Kim, G.-D. Lee, M. Kim, J. Oh, Y.-C. Joo, *J. Mater. Chem. A.* **2020**, *8*, 11632-11641.
- [13] K. Yao, Y. Xia, J. Li, N. Wang, J. Han, C. Gao, M. Han, G. Shen, Y. Liu, A. Seifitokaldani, X. Sun, H. Liang, *J. Mater. Chem. A.* **2020**, *8*, 11117-11123.
- [14] T. T. H. Hoang, S. Verma, S. Ma, T. T. Fister, J. Timoshenko, A. I. Frenkel, P. J. A. Kenis, A. A. Gewirth, *J. Am. Chem. Soc.* **2018**, *140*, 5791-5797.
